# Supplementary material for: Controllable spin rectification behavior of vertical and lateral VSe2/WSe2 heterojunction Schottky diodes
Source: Royal Society of Chemistry journal article supplement (doi:10.1039/d4cp04118f), 2024-12-27
Supplement: d4cp04118f1.pdf [file d4cp04118f1.pdf]

## Supplementary Material

### Controllable Spin Rectification Behavior of Vertical and Lateral VSe<sub>2</sub>/WSe<sub>2</sub> Heterojunctions Schottky Diodes

Xianghe Liu<sup>a</sup>, Hui Chen<sup>a</sup>, Tianruo Xie<sup>a</sup>, Yuliang Mao<sup>ab†</sup>

<sup>a</sup>School of Physics and Optoelectronics, Xiangtan University, Xiangtan 411105, China

<sup>b</sup>National Center for Applied Mathematics in Hunan, Xiangtan University, Xiangtan 411105, China

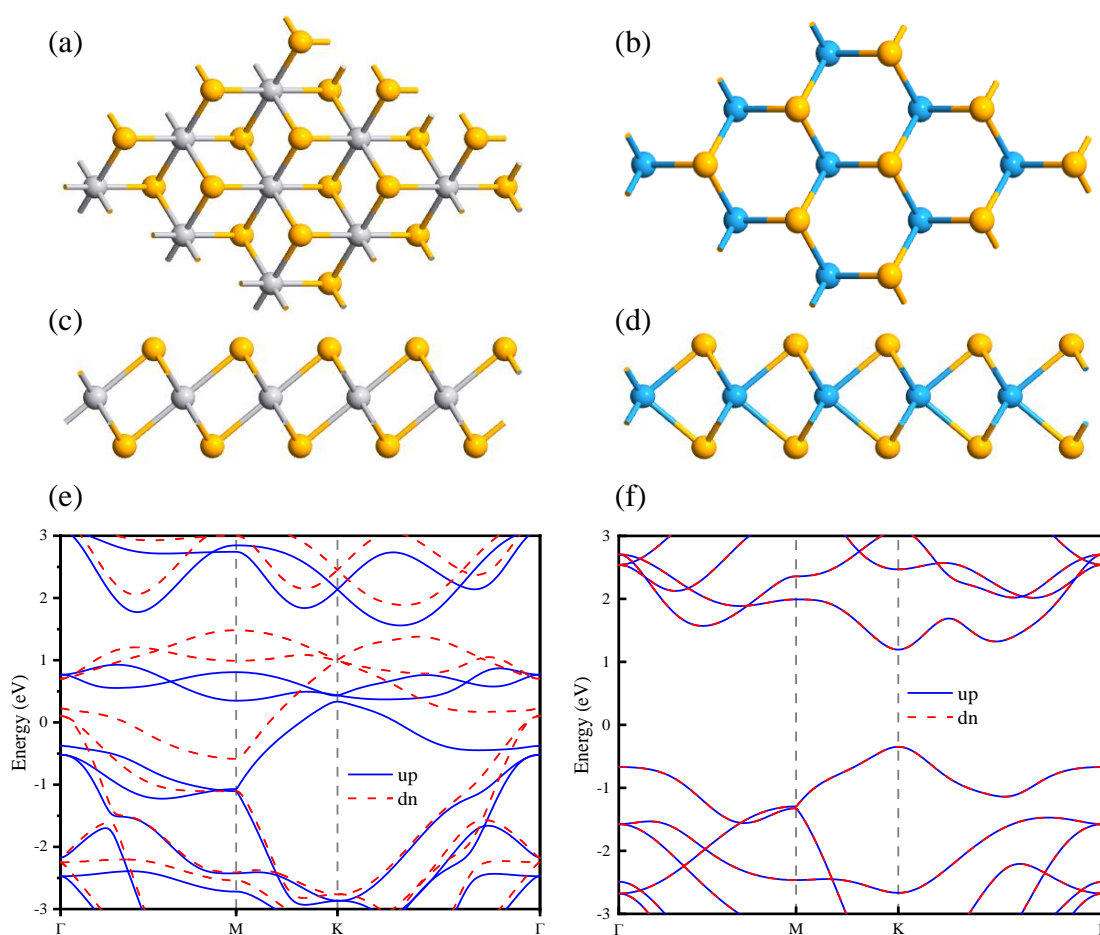

**Figure S1.** (a), (c), and (e): top view, side view, and band structure of 1T-VSe<sub>2</sub>, respectively. (b), (d), and (f): top view, side view, and band structure of 2H-WSe<sub>2</sub>, respectively.

<sup>†</sup>Corresponding author, E-mail address: ylmao@xtu.edu.cn

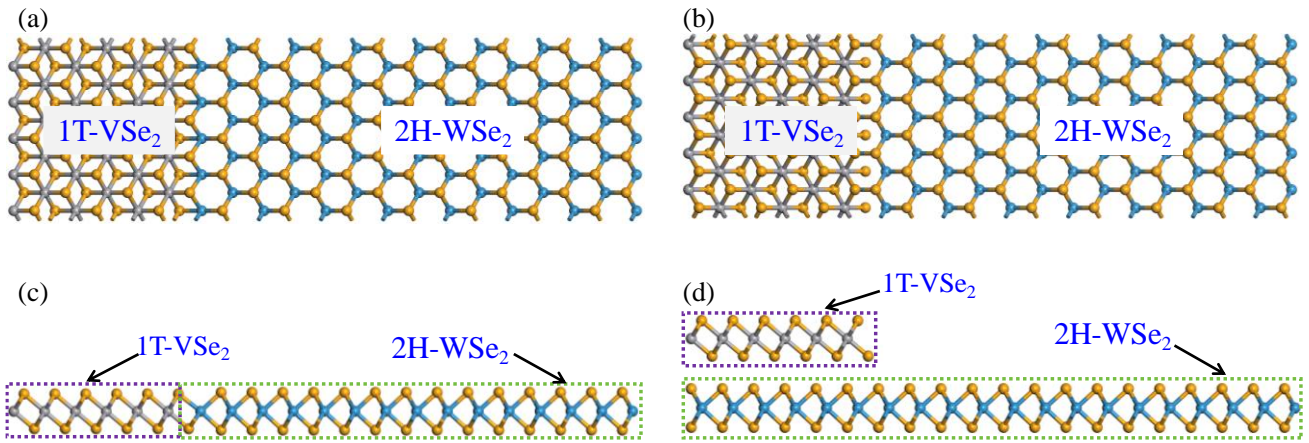

**Figure S2.** (a) and (c) are top and side views of the *L*-type  $\text{VSe}_2/\text{WSe}_2$  heterojunction, respectively. (b) and (d) are top and side views of the *V*-type  $\text{VSe}_2/\text{WSe}_2$  heterojunction, respectively.

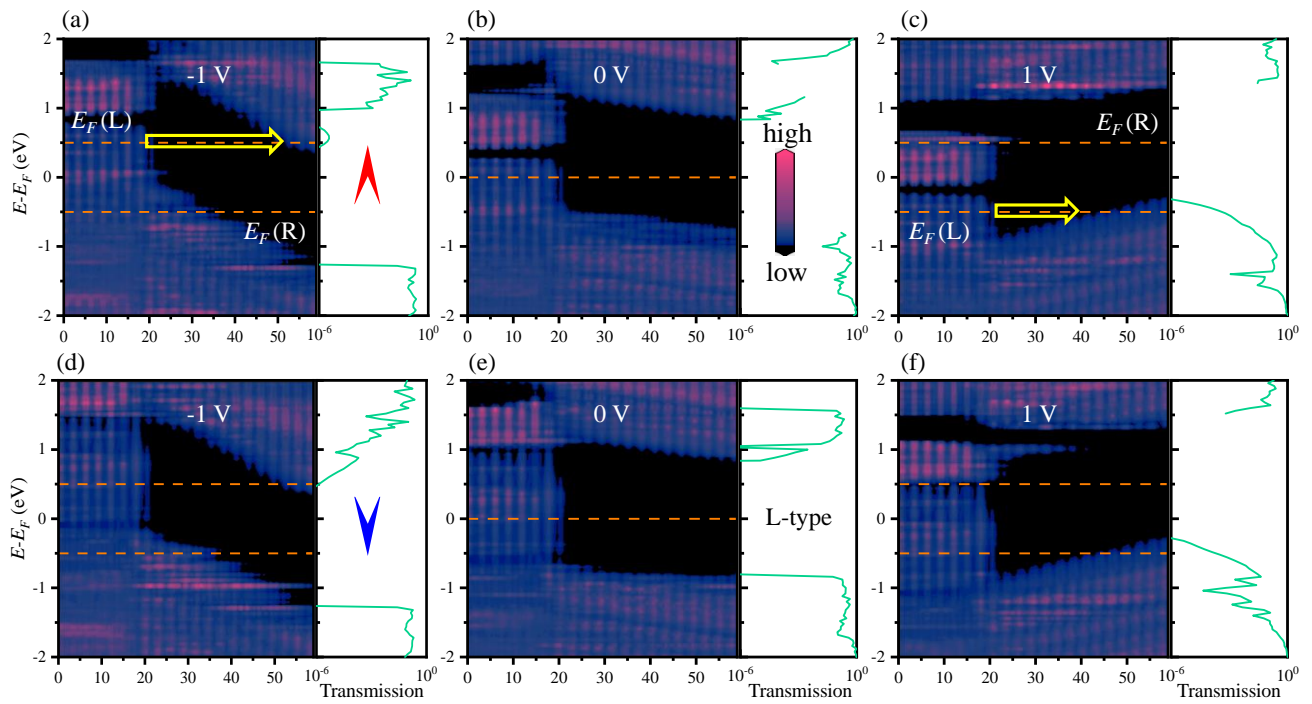

**Figure S3.** PLDOS (left) and transmission spectra (right) of *L*-type  $\text{VSe}_2/\text{WSe}_2$  heterojunction Schottky diode under different biases with zero gate voltage. (a)-(c) and (d)-(f) are spin-up and spin-down states, respectively.

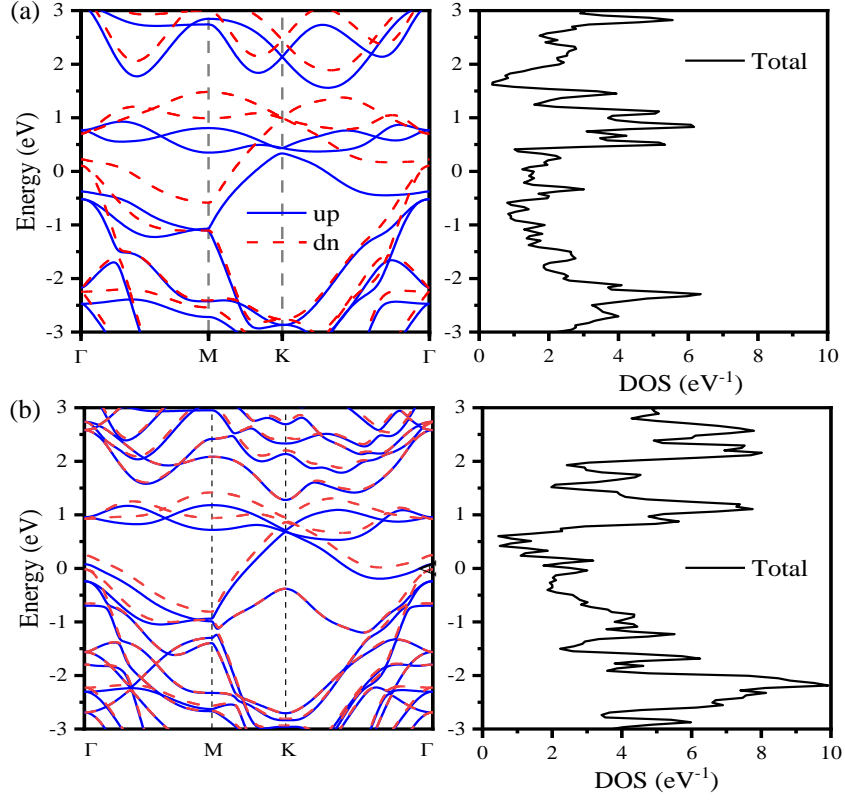

**Figure S4.** (a) Band structure and density of states (DOS) of 1T-VSe<sub>2</sub>. (b) Band structure and DOS of the vertical heterostructure (1T-VSe<sub>2</sub> and 2H-WSe<sub>2</sub>).

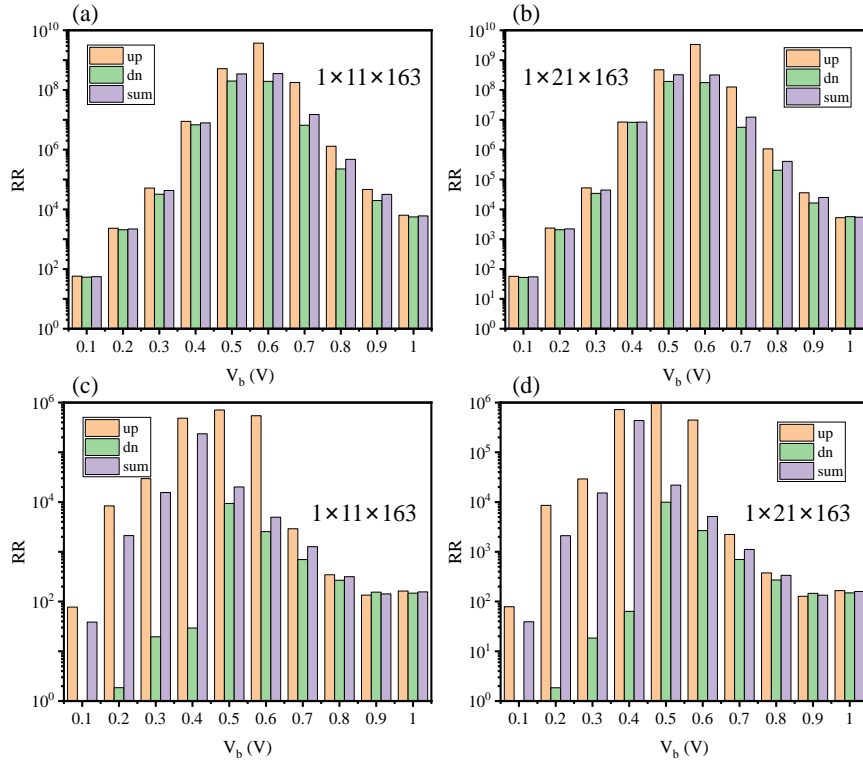

**Figure S5.** (a) and (b) Rectification ratios of the vertical VSe<sub>2</sub>/WSe<sub>2</sub> heterojunction diode at  $1 \times 11 \times 163$  and  $1 \times 21 \times 163$   $k$ -point grids. (c) and (d) Rectification ratios of the lateral VSe<sub>2</sub>/WSe<sub>2</sub> heterojunction diode at different  $k$ -point grids.

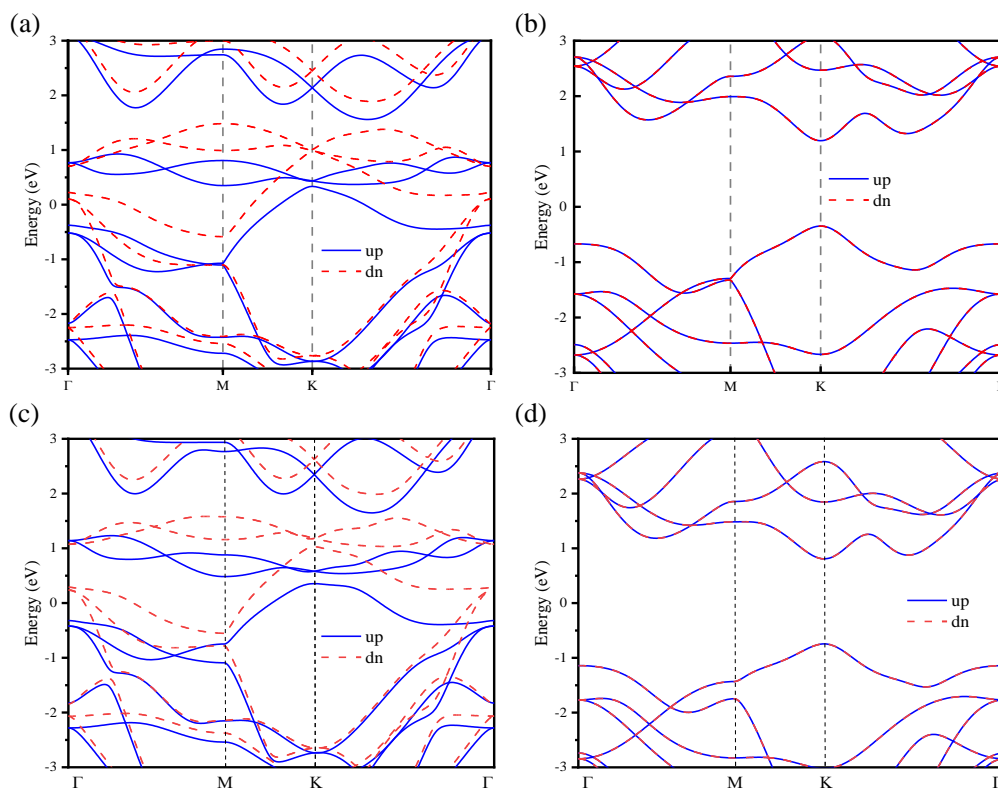

**Figure S6.** Band structures calculated using the VASP software package: (a) 1T-VSe<sub>2</sub> and (b) 2H-WSe<sub>2</sub>. Band structures calculated using the QuantumWise ATK software package: (c) 1T-VSe<sub>2</sub> and (d) 2H-WSe<sub>2</sub>.

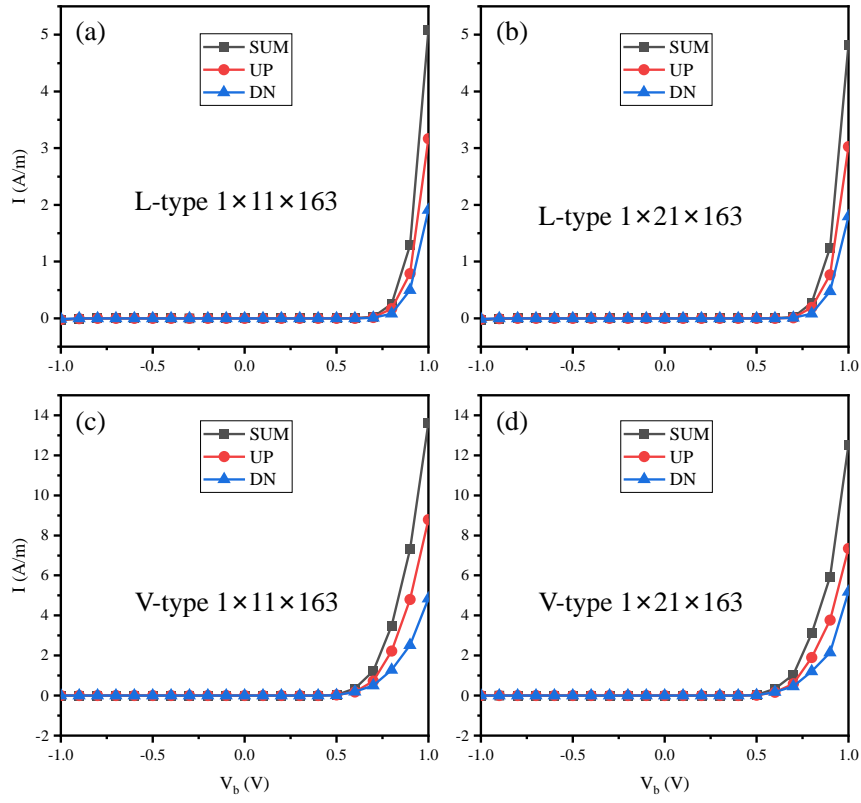

**Figure S7.** (a) and (b)  $I$ - $V$  curves of the lateral  $VSe_2/WSe_2$  heterojunction diode at  $1 \times 11 \times 163$  and  $1 \times 21 \times 163$   $k$ -point grids. (c) and (d)  $I$ - $V$  curves of the vertical  $VSe_2/WSe_2$  heterojunction diode at different  $k$ -point grids.
